# Supplementary material for: Integrating the 40-Gene Expression Profile (40-GEP) Test Improves Metastatic Risk-Stratification Within Clinically Relevant Subgroups of High-Risk Cutaneous Squamous Cell Carcinoma (cSCC) Patients
Source: Springer Nature journal article supplement (doi:10.1007/s13555-024-01111-5), 2024-03-01
Supplement: MOESM1 [file 26809576]

# **Integrating the 40-gene expression profile (40-GEP) test improves metastatic risk-stratification within clinically relevant subgroups of cutaneous squamous cell carcinoma (cSCC) patients**

Authors:

Ashley Wysong, MD, MS<sup>1</sup>; Ally-Khan Somani, MD, PhD<sup>2a,b</sup>; Sherrif F Ibrahim, PhD, MD<sup>3</sup>; Javier Cañueto MD, PhD<sup>4a-c</sup>; Alison L. Fitzgerald, PhD<sup>5</sup>; Jennifer J. Siegel, PhD<sup>5</sup>; Anesh Prasai, PhD<sup>5</sup>; Matthew S Goldberg, MD<sup>5,6</sup>; Aaron S Farberg, MD<sup>7</sup>; Christie Regula, MD<sup>8</sup>; Anna Bar, MD<sup>9</sup>; Julia Kasprzak, MD<sup>10</sup>; David G Brodland, MD<sup>11</sup>; Shlomo A Koyfman, MD<sup>12</sup>; Sarah T. Arron, MD, PhD<sup>13</sup>

1 Department of Dermatology, University of Nebraska Medical Center, Omaha, NE, USA

2a Department of Dermatology, Indiana University School of Medicine, Indianapolis, IN, USA

2b SkinMD, L.L.C., Orland Park, IL, USA

3 Rochester Dermatologic Surgery, Victor, NY, USA

4a Department of Dermatology Complejo Asistencial Universitario de Salamanca, Spain

4b Instituto de Investigación Biomédica de Salamanca (IBSAL), Spain

4c Instituto de Biología Celular y Molecular de Cáncer (CIC-IBMCC)-CSIC/USAL, Spain

5 Research and Development, Castle Biosciences, Inc., Friendswood, TX, USA

6 Icahn School of Medicine at Mount Sinai, New York City, NY, USA

7 Baylor Scott & White Health System, Dallas, TX, USA

8 Vujevich Dermatology Associates, Pittsburgh, PA, USA

9 Department of Dermatology, Oregon Health & Science University, OR, USA

10 Department of Dermatology, Medical College of Wisconsin, Milwaukee, WI, USA

11 Zitelli & Brodland, P.C., Pittsburgh, PA, USA

12 Department of Radiation Oncology, Cleveland Clinic, Cleveland, OH, USA

13 Peninsula Dermatology, Burlingame, CA, USA

Corresponding author:

Sarah T. Arron, MD, PhD  
saraharron@gmail.com

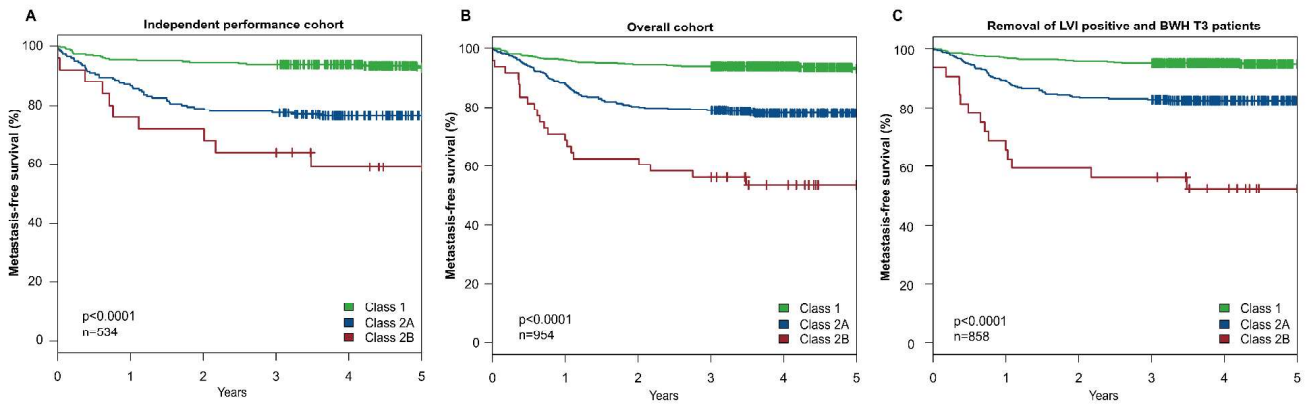

**Risk (n)**

|          |     |     |     |     |     |     |
|----------|-----|-----|-----|-----|-----|-----|
| Class 1  | 309 | 295 | 292 | 290 | 223 | 134 |
| Class 2A | 200 | 173 | 158 | 155 | 115 | 69  |
| Class 2B | 25  | 19  | 18  | 16  | 12  | 9   |

|  |     |     |     |     |     |     |
|--|-----|-----|-----|-----|-----|-----|
|  | 521 | 500 | 492 | 489 | 296 | 171 |
|  | 305 | 337 | 309 | 304 | 190 | 100 |
|  | 48  | 33  | 30  | 27  | 19  | 12  |

|  |     |     |     |     |     |     |
|--|-----|-----|-----|-----|-----|-----|
|  | 496 | 481 | 475 | 472 | 282 | 163 |
|  | 330 | 294 | 276 | 273 | 177 | 94  |
|  | 32  | 21  | 19  | 18  | 12  | 6   |

| Independent performance cohort |                      |            |
|--------------------------------|----------------------|------------|
| 40-GEP risk Class              | 3- year MFS (95% CI) | Event rate |
| Class 1                        | 93.9% (91.2-96.6%)   | 6.8%       |
| Class 2A                       | 77.5% (71.9-83.5%)   | 23.5%      |
| Class 2B                       | 64.0% (47.7-85.9%)   | 40.0%      |
| Overall                        | 86.3% (83.5 -89.3%)  | 14.6%      |

| Overall cohort    |                      |            |
|-------------------|----------------------|------------|
| 40-GEP risk Class | 3- year MFS (95% CI) | Event rate |
| Class 1           | 93.9% (91.8-95.9%)   | 6.7%       |
| Class 2A          | 79.0% (75.0-83.1%)   | 21.8%      |
| Class 2B          | 56.2% (43.8-72.2%)   | 45.8%      |
| Overall           | 86.0% (83.8-88.2%)   | 14.8%      |

| Removal of LVI positive and BWH T3 patients |                      |            |
|---------------------------------------------|----------------------|------------|
| 40-GEP risk Class                           | 3- year MFS (95% CI) | Event rate |
| Class 1                                     | 95.2% (93.3-97.1%)   | 5.2%       |
| Class 2A                                    | 82.7% (78.7-86.9%)   | 17.5%      |
| Class 2B                                    | 56.2% (41.4-76.4%)   | 46.8%      |
| Overall                                     | 88.9% (86.9-91.1%)   | 11.5%      |

SUPPLEMENTAL FIGURE 1. Kaplan-Meier survival analysis demonstrated statistically significant 3-year metastasis-free survival (MFS) between all 40-GEP classes for: A) the independent performance cohort (n=534); B) the overall cohort (n=954); C) removal of LVI positive and BWH T3 patients from the overall cohort (n=893); See Figure 1 for cohort specifics, and Figure 2 for table descriptions. P-values indicate log-rank test. LVI= lymphovascular invasion

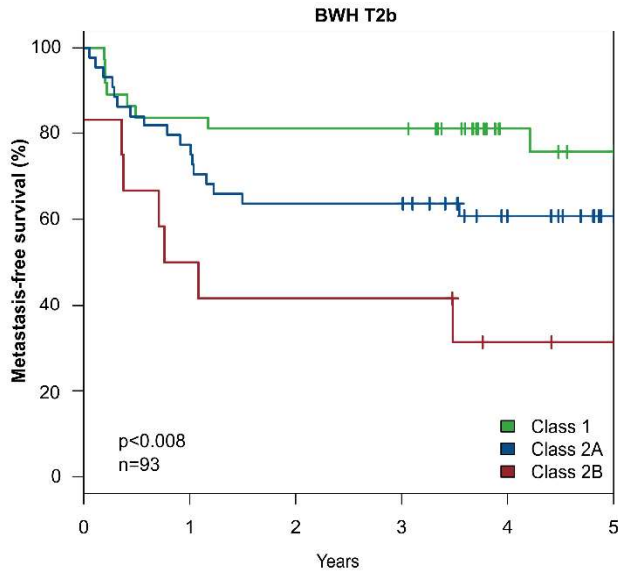

| Risk (n) |    |    |    |    |    |    |
|----------|----|----|----|----|----|----|
| Class 1  | 37 | 31 | 30 | 30 | 15 | 12 |
| Class 2A | 44 | 34 | 28 | 28 | 17 | 9  |
| Class 2B | 12 | 6  | 5  | 5  | 2  | 1  |

| BWH T2b           |                      |            |
|-------------------|----------------------|------------|
| 40-GEP risk Class | 3- year MFS (95% CI) | Event rate |
| Class 1           | 81.1% (69.4-94.7%)   | 21.6%      |
| Class 2A          | 63.6% (50.9-79.6%)   | 38.6%      |
| Class 2B          | 41.7% (21.3-81.4%)   | 66.7%      |
| Overall           | 67.7% (58.9-77.9%)   | 35.5%      |

SUPPLEMENTAL FIGURE 2. Kaplan-Meier survival analysis of Brigham and Women’s Hospital (BWH) higher risk stage, T2b, demonstrated statistically significant 3-year metastasis-free survival (MFS) between all 40-GEP classes. Tables as described in Figure 2; p-value indicates log-rank tests.

SUPPLEMENTAL TABLE 1. Variability in risk factor inclusion and classifications for cSCC

| Clinicopathologic risk factor                                        | 40-GEP testing criteria | Risk classifications systems |       |     |
|----------------------------------------------------------------------|-------------------------|------------------------------|-------|-----|
|                                                                      |                         | NCCN (v1.2024)               | AJCC8 | BWH |
| Tumor size $\geq 2$ cm                                               | ✓                       | ✓                            | ✓     | ✓   |
| Invasion beyond subcutaneous fat or $>6\text{mm}^{\ddagger}$         | ✓                       | ✓                            | ✓     | ✓   |
| Perineural invasion <sup>#</sup>                                     | ✓                       | ✓                            | ✓     | ✓   |
| Poorly differentiated                                                | ✓                       | ✓                            | -     | ✓   |
| Recurrent <sup>†</sup>                                               | -                       | ✓                            | -     | -   |
| Immunosuppression                                                    | ✓                       | ✓                            | -     | -   |
| Site of prior RT or chronic inflammation                             | ✓                       | ✓                            | -     | -   |
| Located on head, neck, genital, hands, and feet or pretibial surface | ✓                       | ✓                            | -     | -   |
| Borders poorly defined                                               | ✓                       | ✓                            | -     | -   |
| Rapidly growing tumor                                                | ✓                       | ✓                            | -     | -   |
| Neurological symptoms                                                | ✓                       | ✓                            | -     | -   |
| Lymphatic or vascular involvement                                    | ✓                       | ✓                            | -     | -   |
| Desmoplastic SCC                                                     | ✓                       | ✓                            | -     | -   |
| Specific high-risk subtypes <sup>##</sup>                            | ✓                       | ✓                            | -     | -   |

NCCN= National Comprehensive Cancer Network v1.2024 (high- or very high-risk factors); AJCC8= American Joint Committee on Cancer version 8; BWH= Brigham and Women's Hospital ‡AJCC8 and NCCN-  $>6\text{mm}$  and bone erosion/invasion included, BWH- bone invasion automatically upstages to highest risk stage- T3; #AJCC8 and NCCN-  $\geq 0.1\text{mm}$  nerve or deeper than dermis, BWH-  $\geq 0.1\text{mm}$  nerve required; †40-GEP is not validated for local recurrence; ##Acantholytic, adenosquamous, or metaplastic subtypes (40-GEP- others will be considered on a case-by-case basis)

SUPPLEMENTAL TABLE 2. Demographics and clinical characteristics of the combined cohort (n=897) based on BWH staging

| Risk Factor                              | Combined<br>(n=897) | T1<br>(n=444) | T2a<br>(n=335) | T2b<br>(n=93)  | T3<br>(n=25)   |
|------------------------------------------|---------------------|---------------|----------------|----------------|----------------|
| <b>Metastatic events</b>                 | 118 (13.15%)        | 29 (24.6%)    | 45 (38.1%)     | 33 (28.0%)     | 11 (9.3%)      |
| <b>40-GEP Distribution</b>               |                     |               |                |                |                |
| Class 1                                  | 510 (56.9%)         | 291 (57.1%)   | 175 (34.3%)    | 37 (7.3%)      | 7 (1.4%)       |
| Class 2A                                 | 350 (39.0%)         | 141 (40.3%)   | 149 (42.6%)    | 44 (12.6%)     | 16 (4.6%)      |
| Class 2B                                 | 37 (4.1%)           | 12 (32.4%)    | 11 (29.7%)     | 12 (32.4%)     | 2 (5.4%)       |
| <b>Patient Characteristics</b>           |                     |               |                |                |                |
| Age, y, median (range)                   | 72 (26-90+)         | 71 (26-90+)   | 73 (44-90+)    | 71 (38-90)     | 74 (43-90)     |
| Male sex, n (%)                          | 653 (72.8%)         | 322 (49.3%)   | 244 (37.4%)    | 67 (10.3%)     | 20 (3.1%)      |
| Immunosuppression, n (%)                 | 230 (25.6%)         | 146 (63.5%)   | 63 (27.4%)     | 17 (7.4%)      | 4 (1.7%)       |
| <b>Tumor Characteristics</b>             |                     |               |                |                |                |
| Head and Neck, n (%)                     | 577 (64.3%)         | 293 (50.8%)   | 192 (33.3%)    | 73 (12.7%)     | 19 (3.3%)      |
| Tumor diameter, cm, mean ± SD            | 1.907 (±1.63)       | 0.989 (±0.45) | 2.445 (±1.39)  | 3.293 (±2.50)  | 4.722 (±2.82)  |
| Tumor thickness, mm, mean ± SD           | 5.259 (±6.63)       | 1.899 (±1.66) | 7.373 (±6.81)  | 10.044 (±7.22) | 10.68 (±14.23) |
| Poorly differentiated, n (%)             | 130 (14.5%)         | 0 (0%)        | 58 (44.6%)     | 58 (44.6%)     | 14 (10.8%)     |
| Perineural invasion <sup>§</sup> , n (%) | 46 (5.1%)           | 8 (17.4%)     | 13 (28.3%)     | 18 (39.1%)     | 7 (15.2%)      |
| Lymphovascular invasion, n (%)           | 14 (1.6%)           | 3 (21.4%)     | 1 (7.1%)       | 7 (50.0%)      | 3 (21.4%)      |
| Invasion beyond subcutaneous fat, n (%)  | 81 (9.03%)          | 0 (0%)        | 34 (42.0%)     | 38 (46.9%)     | 9 (11.1%)      |
| <b>Surgery Type</b>                      |                     |               |                |                |                |
| Mohs <sup>‡</sup>                        | 601 (67.0%)         | 312 (51.9%)   | 236 (39.3%)    | 48 (8.0%)      | 5 (0.8%)       |

p-value reported for Person Chi-squared or Wilcoxon F test, as appropriate; SD = standard deviation; § presence of PNI; ‡ other surgery types: biopsy, electrocauterization, and wide local excision. BWH= Brigham and Women's Hospital
